# Supplementary material for: Sex and hormonal status influence the anxiolytic-like effect of oxytocin in mice
Source: PubMed Central journal article supplement — Neurobiol Stress. 2023 Aug 26;26:100567. doi: 10.1016/j.ynstr.2023.100567 (PMC10495655; doi:10.1016/j.ynstr.2023.100567), 2023-08-26
Supplement: mmc1.pdf [file mmc1.pdf]

## Supplemental Material

### Table of Contents

Appendix A. Comparison of differences from the mean baseline measure of open zone occupancy and entries in the elevated zero for male and female mice

### Appendix A. Comparison of differences from the mean baseline measure of open zone occupancy and entries in the elevated zero for male and female mice

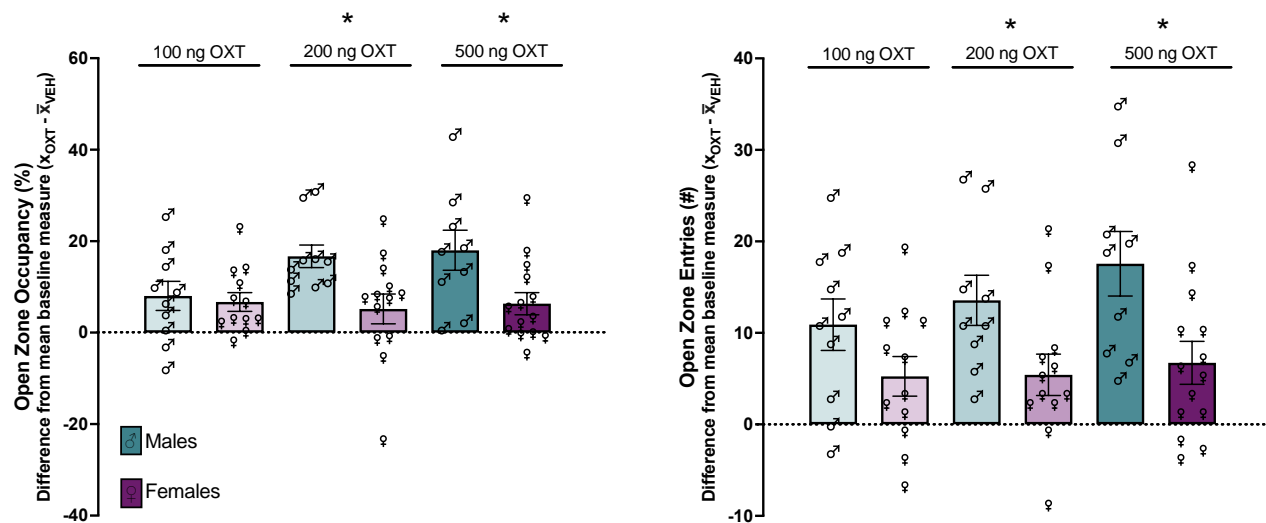

**Supplemental Figure S1.** Differences from the mean baseline measure of open zone occupancy and entries in the elevated zero maze. Two-tailed t-tests were computed to compare difference from the mean baseline measure ( $\bar{X}_{OXT} - \bar{X}_{VEH}$ ) for each dose (100, 200 and 500 ng) of oxytocin across open zone occupancy and entries. This analysis demonstrates a greater difference from the mean baseline measure for males compared to females at the 200 ng and 500 ng doses oxytocin in open zone occupancy and entries. \* $p < 0.05$
